# Supplementary material
Source: PubMed Central journal article supplement (PMC8425618)
Supplement: CJN.01060121SupplementaryData.pdf [file CJN.01060121SupplementaryData.pdf]

## **ONLINE SUPPLEMENTARY MATERIALS**

**Title:** Prediction of incident atrial fibrillation in chronic kidney disease: the CRIC Study

**Authors:** Zelnick LR, Shlipak MG, Soliman EZ, et al.

**Supplemental Figure 1.** CONSORT diagram of analytic population

**Supplemental Figure 2.** Calibration plot for CHARGE-AF equation with original coefficients

**Supplemental Figure 3.** Distribution of predicted probabilities of atrial fibrillation at 5 years from likelihood-based boosting model (all clinical and cardiac biomarker data), by category of eGFR

**Supplemental Figure 4.** Calibration plot for super learner predicted probabilities

**Supplemental Table 1.** List of clinical and cardiac biomarker variables available for use in predictive models

**Supplemental Table 2.** Percent weighting used for super learner predictions

**Supplemental Table 3.** Discriminatory ability of several modeling strategies not including race/ethnicity to predict incident atrial fibrillation, compared with the published CHARGE-AF model

**Supplemental Table 4.** Final coefficient estimates of likelihood-based boosting model using clinical and cardiac biomarker data, excluding race/ethnicity

Supplemental Figure 1. CONSORT diagram of analytic population

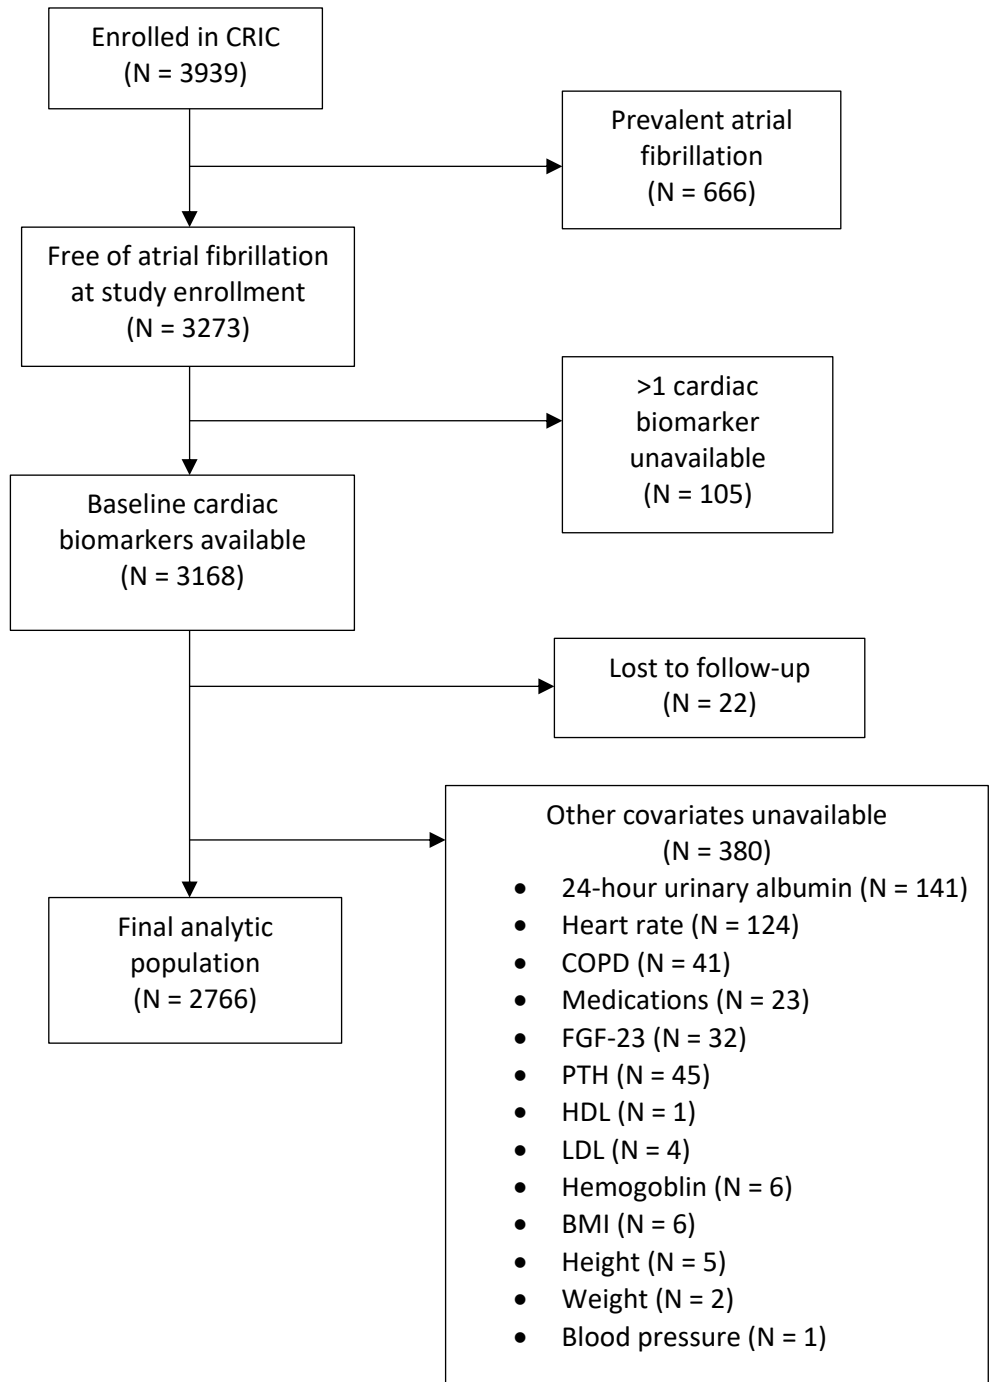

Supplemental Figure 2. Calibration plot for CHARGE-AF equation with original coefficients

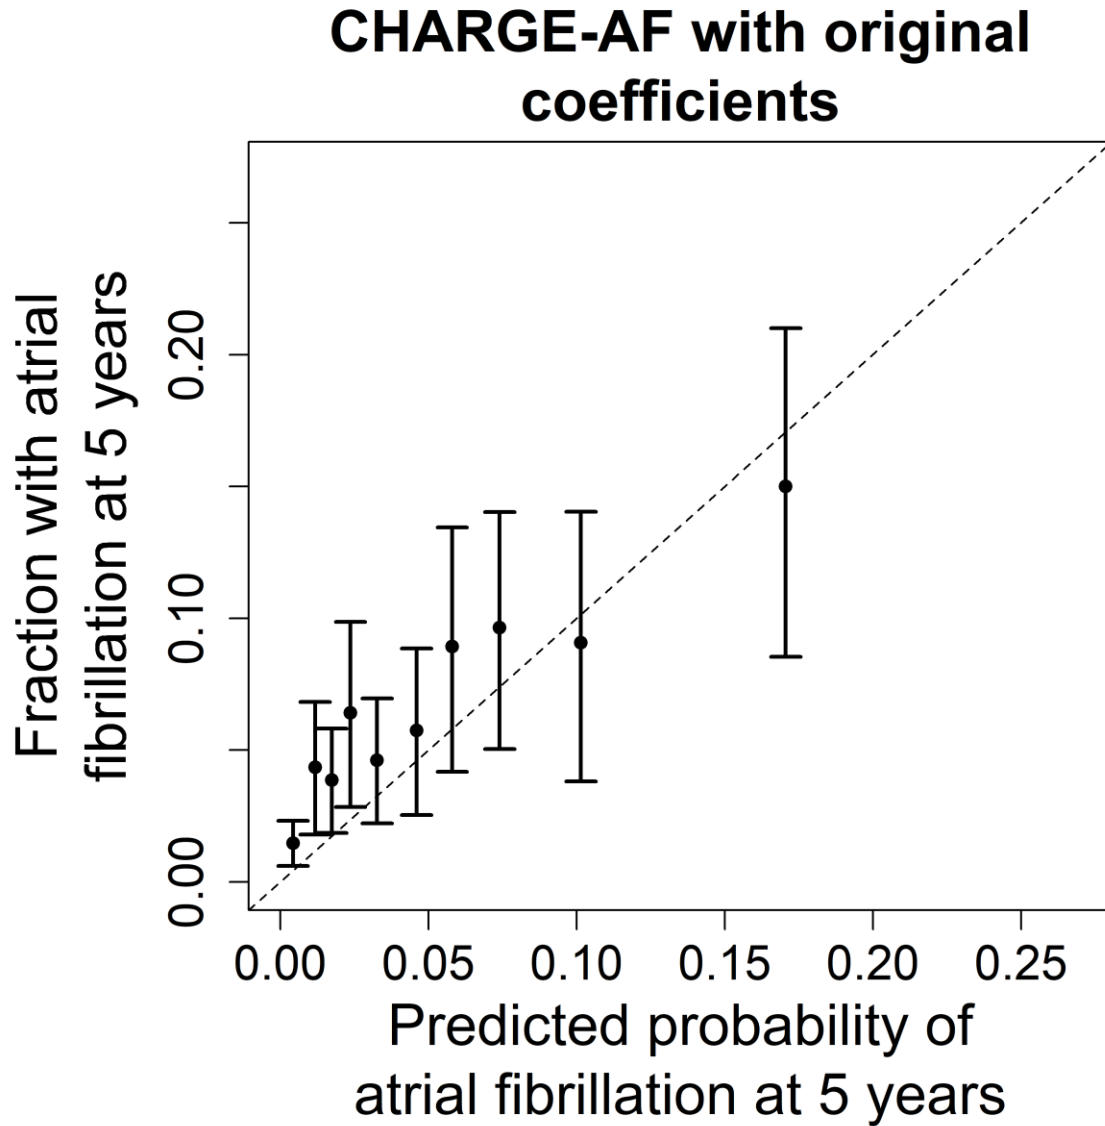

Figure shows predicted and observed probabilities of atrial fibrillation at 5 years, by decile of predicted probability. The associated Grønnesby and Borgan p-value > 0.10.

**Supplemental Figure 3. Distribution of predicted probabilities of atrial fibrillation at 5 years from likelihood-based boosting model (all clinical and cardiac biomarker data), by category of eGFR (mL/min/1.73m<sup>2</sup>)**

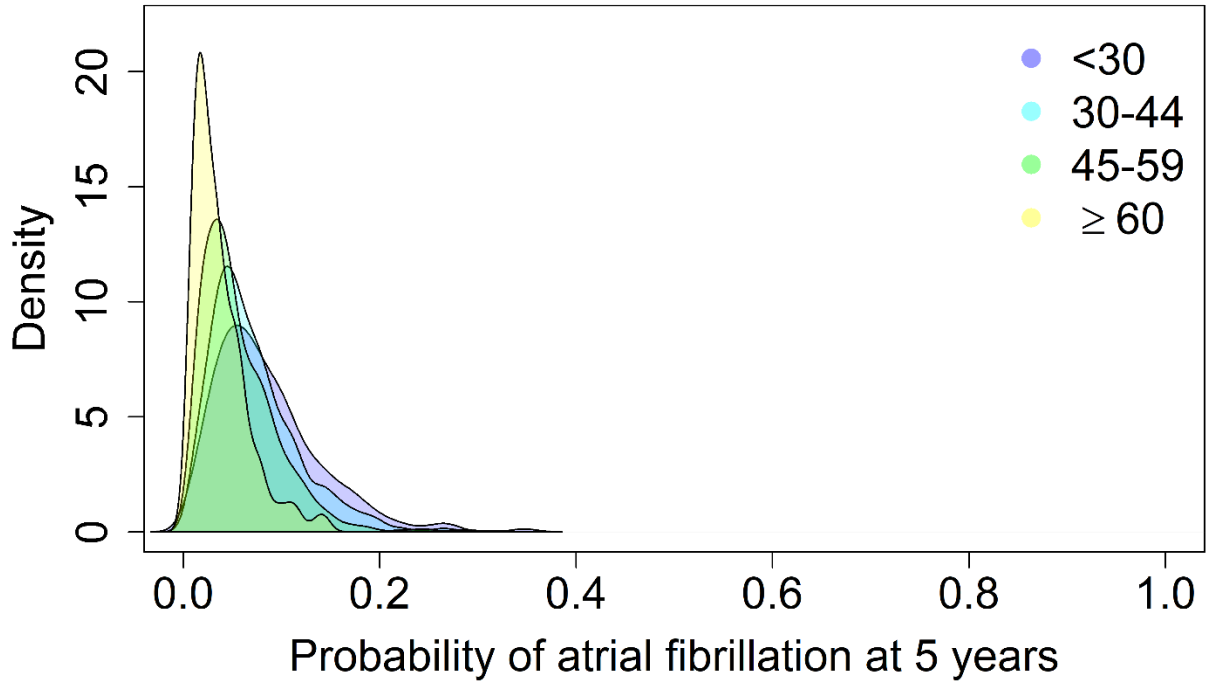

Supplemental Figure 4. Calibration plot for super learner predicted probabilities

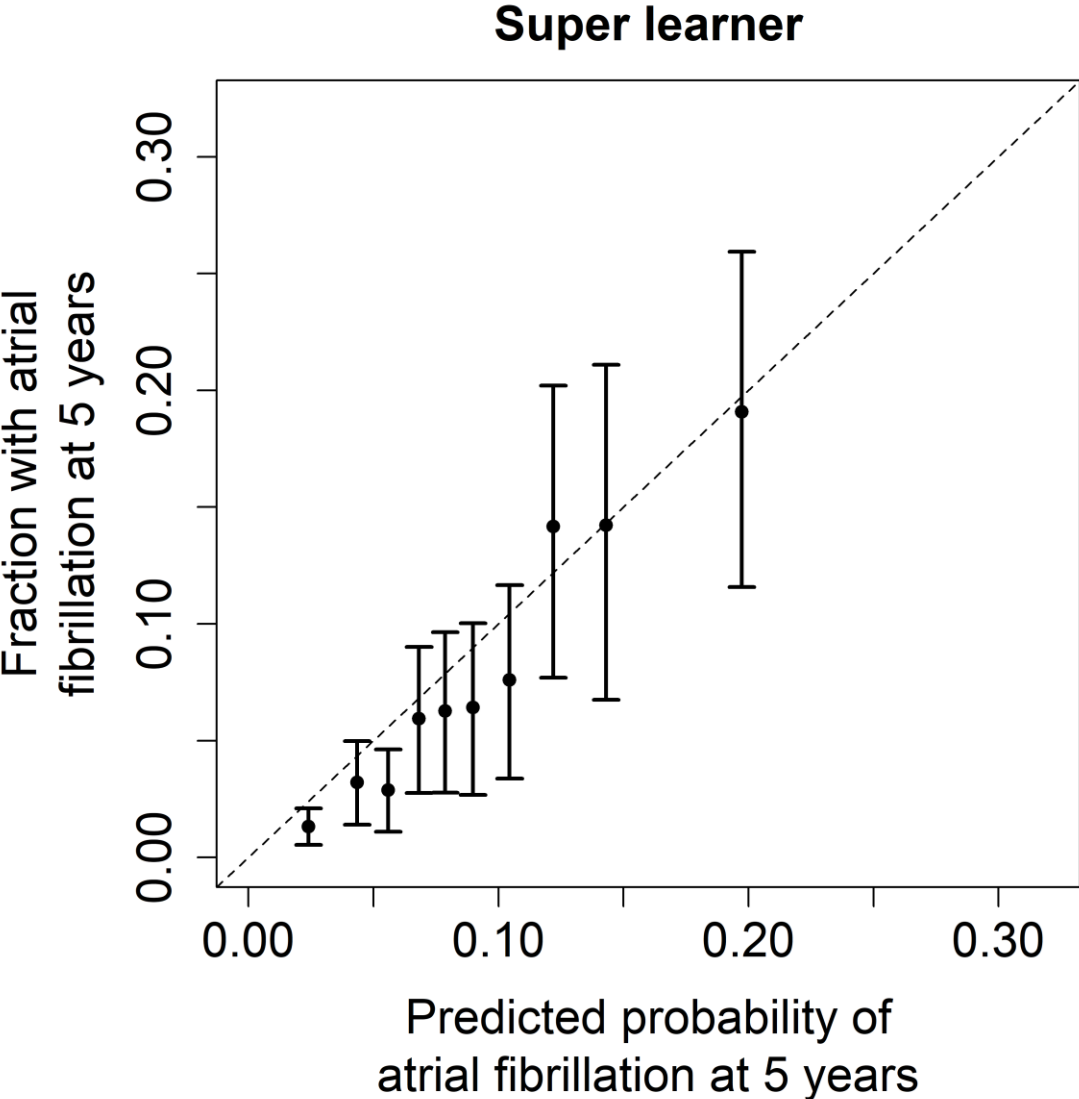

Figure shows predicted and observed probabilities of atrial fibrillation at 5 years, by decile of predicted probability. The associated Grønnesby and Borgan p-value > 0.10.

**Supplemental Table 1. List of clinical and cardiac biomarker variables available for use in predictive models**

|                                                                                        |
|----------------------------------------------------------------------------------------|
| <b>Demographics</b>                                                                    |
| Age                                                                                    |
| Sex                                                                                    |
| Self-reported race/ethnicity (non-Hispanic white, non-Hispanic black, Hispanic, other) |
| <b>Medical history</b>                                                                 |
| Diabetes mellitus                                                                      |
| History of cardiovascular disease                                                      |
| History of congestive heart failure                                                    |
| History of chronic obstructive pulmonary disease                                       |
| History of myocardial infarction                                                       |
| History of peripheral vascular disease                                                 |
| History of stroke                                                                      |
| Current smoking                                                                        |
| <b>Markers of kidney function</b>                                                      |
| eGFR (CKD-EPI) (mL/min/1.73m <sup>2</sup> )                                            |
| 24-hour urine albumin (g/d)                                                            |
| <b>Clinical characteristics and laboratory measurements</b>                            |
| BMI (kg/m <sup>2</sup> )                                                               |
| Systolic blood pressure (mmHg)                                                         |
| Diastolic blood pressure (mmHg)                                                        |
| ECG heart rate (bpm)                                                                   |
| Hemoglobin (g/dL)                                                                      |
| LDL cholesterol (mg/dL)                                                                |
| HDL cholesterol (mg/dL)                                                                |
| FGF-23 (RU/mL)                                                                         |
| Total PTH (pg/mL)                                                                      |
| <b>Medications</b>                                                                     |
| Antihypertensive medication                                                            |
| ACEi/ARBs                                                                              |
| Beta blockers                                                                          |
| Calcium channel blockers                                                               |
| Diuretics                                                                              |
| <b>Cardiac biomarkers</b>                                                              |
| NT-proBNP (pg/mL)                                                                      |
| hsTNT (pg/mL)                                                                          |

Abbreviations: eGFR, estimated glomerular filtration rate; BMI, body mass index; ECG, electrocardiogram; LDL, low-density lipoprotein; HDL, high-density lipoprotein; FGF, fibroblast growth factor; ACEi, angiotensin-converting enzyme inhibitor; ARB, angiotensin receptor blocker

**Supplemental Table 2. Percent weighting used for super learner predictions**

| <b>Algorithm</b>                       | <b>Percent (%) weighting by super learner algorithm</b> |
|----------------------------------------|---------------------------------------------------------|
| CHARGE-AF                              | 2.7                                                     |
| CHARGE-AF (re-estimated)               | 0.0                                                     |
| Stepwise regression                    |                                                         |
| Clinical variables only                | 3.3                                                     |
| Clinical variables + NT-proBNP         | 5.7                                                     |
| Clinical variables + hsTNT             | 0.5                                                     |
| Clinical variables + NT-proBNP + hsTNT | 3.1                                                     |
| LASSO                                  |                                                         |
| Clinical variables only                | 0.0                                                     |
| Clinical variables + NT-proBNP         | 0.0                                                     |
| Clinical variables + hsTNT             | 0.0                                                     |
| Clinical variables + NT-proBNP + hsTNT | 0.0                                                     |
| Ridge regression                       |                                                         |
| Clinical variables only                | 0.0                                                     |
| Clinical variables + NT-proBNP         | 4.2                                                     |
| Clinical variables + hsTNT             | 0.0                                                     |
| Clinical variables + NT-proBNP + hsTNT | 5.3                                                     |
| Likelihood-based boosting model        |                                                         |
| Clinical variables only                | 0.0                                                     |
| Clinical variables + NT-proBNP         | 28.4                                                    |
| Clinical variables + hsTNT             | 0.0                                                     |
| Clinical variables + NT-proBNP + hsTNT | 36.3                                                    |
| Generalized boosting regression model  |                                                         |
| Clinical variables only                | 0.0                                                     |
| Clinical variables + NT-proBNP         | 2.4                                                     |
| Clinical variables + hsTNT             | 0.0                                                     |
| Clinical variables + NT-proBNP + hsTNT | 7.8                                                     |

Percent weighting of individual algorithms chosen by 10-fold cross validation; percentages sum to 100%, within rounding error.

**Supplemental Table 3. Discriminatory ability of several modeling strategies not including race/ethnicity to predict incident atrial fibrillation, compared with the published CHARGE-AF model**

|                                        | C-index (95% CI)     | Difference from CHARGE-AF C-index (95% CI) |
|----------------------------------------|----------------------|--------------------------------------------|
| CHARGE-AF                              | 0.674 (0.642, 0.706) | NA                                         |
| Stepwise regression                    |                      |                                            |
| Clinical variables only                | 0.640 (0.608, 0.673) | -0.034 (-0.054, -0.014)                    |
| Clinical variables + NT-proBNP         | 0.702 (0.671, 0.733) | <b>0.028 (0.001, 0.055)</b>                |
| Clinical variables + hsTNT             | 0.673 (0.643, 0.704) | -0.001 (-0.022, 0.020)                     |
| Clinical variables + NT-proBNP + hsTNT | 0.702 (0.671, 0.733) | <b>0.028 (0.001, 0.055)</b>                |
| LASSO                                  |                      |                                            |
| Clinical variables only                | 0.645 (0.613, 0.677) | -0.029 (-0.048, -0.011)                    |
| Clinical variables + NT-proBNP         | 0.706 (0.676, 0.737) | <b>0.032 (0.007, 0.057)</b>                |
| Clinical variables + hsTNT             | 0.670 (0.639, 0.702) | -0.004 (-0.024, 0.016)                     |
| Clinical variables + NT-proBNP + hsTNT | 0.709 (0.679, 0.740) | <b>0.035 (0.010, 0.060)</b>                |
| Ridge regression                       |                      |                                            |
| Clinical variables only                | 0.656 (0.624, 0.689) | -0.018 (-0.042, 0.007)                     |
| Clinical variables + NT-proBNP         | 0.699 (0.667, 0.730) | 0.025 (-0.001, 0.050)                      |
| Clinical variables + hsTNT             | 0.667 (0.635, 0.699) | -0.007 (-0.032, 0.018)                     |
| Clinical variables + NT-proBNP + hsTNT | 0.702 (0.670, 0.733) | <b>0.028 (0.002, 0.053)</b>                |
| Likelihood-based boosting model        |                      |                                            |
| Clinical variables only                | 0.651 (0.619, 0.683) | -0.023 (-0.042, -0.004)                    |
| Clinical variables + NT-proBNP         | 0.709 (0.678, 0.740) | <b>0.035 (0.010, 0.060)</b>                |
| Clinical variables + hsTNT             | 0.670 (0.638, 0.702) | -0.004 (-0.025, 0.016)                     |
| Clinical variables + NT-proBNP + hsTNT | 0.710 (0.679, 0.741) | <b>0.036 (0.011, 0.061)</b>                |
| Generalized boosting regression model  |                      |                                            |
| Clinical variables only                | 0.657 (0.625, 0.689) | -0.017 (-0.042, 0.008)                     |
| Clinical variables + NT-proBNP         | 0.700 (0.666, 0.733) | 0.026 (-0.004, 0.055)                      |
| Clinical variables + hsTNT             | 0.676 (0.645, 0.706) | 0.001 (-0.026, 0.029)                      |
| Clinical variables + NT-proBNP + hsTNT | 0.710 (0.676, 0.743) | <b>0.036 (0.005, 0.066)</b>                |
| Super learner algorithm                | 0.720 (0.689, 0.750) | <b>0.046 (0.025, 0.066)</b>                |

Entry for CHARGE-AF is C-index and associated 95% bootstrap confidence interval; all other entries are 10-fold cross-validated C-indices or difference in C-indices and associated 95% bootstrap confidence intervals. Bolded entries indicate statistical significance at the  $\alpha=0.05$  level. CHARGE-AF model predicts atrial fibrillation from age, white race/ethnicity, height, weight, systolic blood pressure, diastolic blood pressure, smoking, use of antihypertensives, diabetes, congestive heart failure, and myocardial infarction. Predictions from super learner algorithm are derived from individual algorithm predictions.



**Supplemental Table 4. Final coefficient estimates of likelihood-based boosting model using clinical and cardiac biomarker data, excluding race/ethnicity**

| <b>Variable</b>                                  | <b>Estimated coefficient</b> |
|--------------------------------------------------|------------------------------|
| Age (years)                                      | 0.374                        |
| History of cardiovascular disease                | 0.00749                      |
| History of chronic obstructive pulmonary disease | 0.0298                       |
| History of myocardial infarction                 | 0.0238                       |
| History of peripheral vascular disease           | -0.0249                      |
| Use of ACEi/ARBs                                 | 0.0391                       |
| Use of diuretics                                 | 0.0258                       |
| Height (cm)                                      | 0.0641                       |
| Weight (kg)                                      | 0.188                        |
| Current smoking                                  | -0.00792                     |
| Diastolic blood pressure (mmHg)                  | -0.00785                     |
| Log(NT-proBNP (pg/mL))                           | 0.440                        |
| Log(hsTNT (pg/mL))                               | 0.0662                       |

Predicted 5-year risk of atrial fibrillation is  $1 - 0.9496 e^{(\sum X\beta)}$ , where  $\beta$  is the regression coefficient and X is the level for each risk factor listed above.

Abbreviations: ACEi, angiotensin-converting enzyme inhibitor; ARB, angiotensin receptor blocker
